# Supplementary material for: Bioactive peptides derived fromRadix Angelicae sinensisinhibit ferroptosis in HT22 cells through direct Keap1–Nrf2 PPI inhibition
Source: Royal Society of Chemistry journal article supplement (doi:10.1039/d3ra04057g), 2023-01-01
Supplement: d3ra04057g1.pdf [file d3ra04057g1.pdf]

## Supplementary Information

### **Bioactive peptides derived from *Radix Angelicae Sinensis* inhibit ferroptosis in HT22 cells through direct Keap1-Nrf2 PPI inhibition**

Ban Chen,<sup>a</sup> Xiaojian Ouyang,<sup>\*b</sup> Chunfeng Cheng,<sup>c</sup> Dongfeng Chen,<sup>d</sup> Jiangtao Su,<sup>a</sup> Yuchen Hu<sup>a</sup> and Xican Li<sup>\*e</sup>

- a. Key Laboratory of Fermentation Engineering (Ministry of Education), Cooperative Innovation Center of Industrial Fermentation (Ministry of Education & Hubei Province), Hubei University of Technology, Wuhan, 430068, China.
- b. IncreasePharm Hengqin Inst. Co., Ltd., Zhuhai, 519000, China. E-mail: oyxiaojian55@163.com
- c. Shenzhen Hospital of Integrated Traditional Chinese and Western Medicine, Shenzhen, 518000, China.
- d. School of Basic Medical Science, Guangzhou University of Chinese Medicine, Guangzhou 510000, China.
- e. School of Chinese Herbal Medicine; Guangzhou University of Chinese Medicine, Guangzhou, 510000, China. E-mail: lixican@126.com

## Contents

|                                                                                                                               |    |
|-------------------------------------------------------------------------------------------------------------------------------|----|
| Fig. S1 Protein content of the supernatant after acid precipitation at different pH values. ....                              | 4  |
| Table S1 Hydrolysis conditions under different proteases.....                                                                 | 5  |
| Fig. S2 Antioxidant activity of RAS protein hydrolysates (RPHs).....                                                          | 6  |
| Fig. S3 The effects of alkali extraction pH, liquid/solid ratio, time, and temperature on the yield (%) of RAS proteins ..... | 7  |
| Table S2 Three independent variables with their corresponding levels when extracting RAS protein.....                         | 8  |
| Table S3 Box–Behnken response surface design scheme and results when extracting RAS protein.....                              | 9  |
| Table S4 ANOVA for response surface quadratic model of extraction process.....                                                | 10 |
| Fig. S4 The degree of hydrolysis (DH) of RAS protein powder under different proteases.....                                    | 11 |
| Fig. S5 The degree of hydrolysis (DH) and radical scavenging activity of RAS protein powder under different proteases. ....   | 12 |
| Fig. S6 Different factors on the DPPH <sup>•</sup> -scavenging activity of RPHs.....                                          | 13 |
| Table S5 Four independent variables with their corresponding levels when hydrolysing RAS protein. ....                        | 14 |
| Table S6 Box–Behnken response surface design scheme and results when hydrolysing RAS protein.....                             | 15 |
| Table S7 ANOVA for the response surface quadratic model of the hydrolysis process. ....                                       | 16 |
| Fig. S7 The antioxidant activity of RPHs. ....                                                                                | 17 |
| Fig. S8 The total ion chromatogram of F2. ....                                                                                | 18 |
| Table S8 Information on the top 50 RASPs in peak area.....                                                                    | 19 |
| Table S9 The antioxidant activity, $E_{HOMO}$ and $\Delta E$ of 20 common amino acids. ....                                   | 21 |
| Fig. S9 The MS/MS data of RASP MFQGF.....                                                                                     | 22 |
| Fig. S10 The MS/MS data of RASP FQGF. ....                                                                                    | 23 |
| Fig. S11 The MS/MS data of RASP VLPQL.....                                                                                    | 24 |
| Fig. S12 The MS/MS data of RASP FLLP. ....                                                                                    | 25 |
| Fig. S13 The MS/MS data of RASP FVTP.....                                                                                     | 26 |
| Fig. S14 The MS/MS data of RASP LLGY.....                                                                                     | 27 |
| Fig. S15 The MS/MS data of RASP LYN. ....                                                                                     | 28 |
| Fig. S16 The MS/MS data of RASP LAY. ....                                                                                     | 29 |
| Fig. S17 The MS/MS data of RASP TVTY.....                                                                                     | 30 |
| Fig. S18 The MS/MS data of RASP VTGGSYG. ....                                                                                 | 31 |
| Table S10 <i>Pearson</i> correlation analysis between $IC_{50}$ , $E_{HOMO}$ , and $\Delta E$ ( $r$ , $P$ ). ....             | 32 |
| Fig. S19 HOMO of the 10 RASPs (a) and antioxidant amino acids (b).....                                                        | 33 |
| Fig. S20 HT22 cell viability under incubation with F2 fraction (500 $\mu$ g/mL) or RASPs (1000 $\mu$ M) for 24 h.....         | 34 |

|                                                                                                                        |    |
|------------------------------------------------------------------------------------------------------------------------|----|
| Fig. S21 HT22 cell viability under the incubation of erastin at various concentrations and times.....                  | 35 |
| Fig. S22 Effect of erastin on HT22 cell morphology (a1~c1, 100X) and intracellular LPO content (a2~c2, 200X).<br>..... | 36 |
| Fig. S23 Raw data of Western blots.....                                                                                | 37 |
| Fig. S24 3D conformation of MFQGF-Keap1 and LLGY-Keap1 obtained from MD simulation.....                                | 38 |
| Fig. S25 RMSD of MFQGF-Keap1 (a) and LLGY-Keap1 (b) derived from MD simulation.....                                    | 39 |
| Fig. S26 RMSF of MFQGF-Keap1 (a) and LLGY-Keap1 (b) derived from MD simulation. ....                                   | 40 |
| Fig. S27 Interaction mode of the MFQGF-Keap1. ....                                                                     | 41 |
| Fig. S28 Interaction mode of the LLGY-Keap1. ....                                                                      | 42 |
| Table S11 Binding free energies and energy components predicted by MM/GBSA (kcal/mol).....                             | 43 |

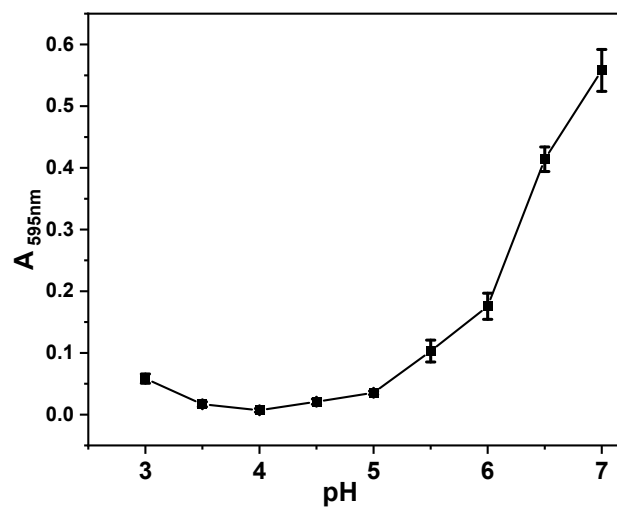

Fig. S1 Protein content of the supernatant after acid precipitation at different pH values. The content was determined using the Bradford assay, and it was evaluated using the absorbance at 595 nm ( $A_{595}$ ).

Table S1 Hydrolysis conditions under different proteases.

| Protease          | Enzyme activity (U/g) | pH   | Enzymatic temperature (°C) | Enzymatic time (h) | Amount of enzyme added (U/g) |
|-------------------|-----------------------|------|----------------------------|--------------------|------------------------------|
| Alkaline protease | $2.0 \times 10^5$     | 10.5 | 45                         | 6                  | 2500                         |
| Acid protease     | $5.0 \times 10^4$     | 3.5  | 50                         | 6                  | 2500                         |
| Neutrase          | $5.0 \times 10^4$     | 6.5  | 40                         | 6                  | 2500                         |
| Pepsin            | $2.5 \times 10^5$     | 2.5  | 37                         | 6                  | 2500                         |
| Papain            | $2.0 \times 10^5$     | 6.5  | 55                         | 6                  | 2500                         |
| Parenzyme         | $2.5 \times 10^6$     | 7.5  | 37                         | 6                  | 2500                         |

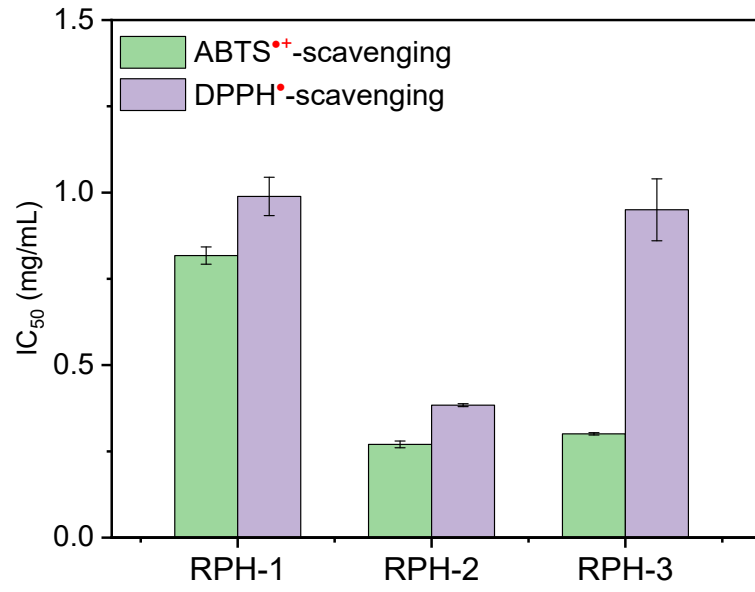

Fig. S2 Antioxidant activity of RAS protein hydrolysates (RPHs).

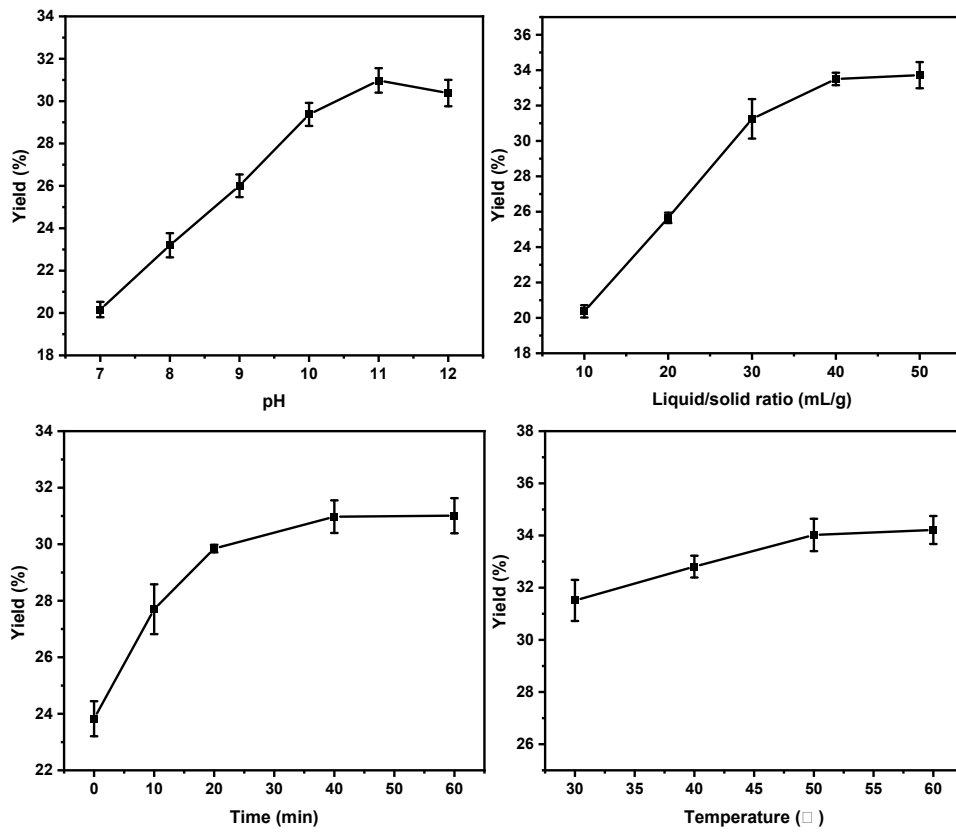

Fig. S3 The effects of alkali extraction pH, liquid/solid ratio, time, and temperature on the yield (%) of RAS proteins.

Table S2 Three independent variables with their corresponding levels when extracting RAS protein.

| Level | Independent variables |      |    |
|-------|-----------------------|------|----|
|       | A                     | B    | C  |
| 1     | 10                    | 30:1 | 10 |
| 2     | 11                    | 40:1 | 20 |
| 3     | 12                    | 50:1 | 30 |

A, alkali extraction pH; B, liquid/solid ratio (mL/g); C, time (min).



Table S3 Box–Behnken response surface design scheme and results when extracting RAS protein.

| Run | A  | B  | C  | Yield (%) |
|-----|----|----|----|-----------|
| 1   | 11 | 30 | 30 | 32.64     |
| 2   | 11 | 50 | 30 | 33.68     |
| 3   | 11 | 40 | 20 | 31.63     |
| 4   | 12 | 40 | 30 | 33.39     |
| 5   | 11 | 40 | 20 | 31.95     |
| 6   | 10 | 50 | 20 | 26.83     |
| 7   | 10 | 40 | 30 | 29.24     |
| 8   | 11 | 40 | 20 | 31.94     |
| 9   | 11 | 40 | 20 | 31.63     |
| 10  | 10 | 40 | 10 | 25.62     |
| 11  | 12 | 40 | 10 | 33.61     |
| 12  | 11 | 50 | 10 | 33.15     |
| 13  | 11 | 40 | 20 | 31.67     |
| 14  | 10 | 30 | 20 | 28.29     |
| 15  | 11 | 30 | 10 | 30.44     |
| 16  | 12 | 50 | 20 | 36.36     |
| 17  | 12 | 30 | 20 | 30.84     |

A, alkali extraction pH; B, liquid/solid ratio (mL/g); C, time (min).

Table S4 ANOVA for response surface quadratic model of extraction process.

| Source         | Sum of Squares | <i>df</i> | Mean square                   | <i>F</i>                          | <i>P</i> |
|----------------|----------------|-----------|-------------------------------|-----------------------------------|----------|
| Model          | 113.6938       | 9         | 12.6327                       | 488.5200                          | <0.0001  |
| A              | 73.3684        | 1         | 73.3684                       | 2837.2600                         | <0.0001  |
| B              | 7.6323         | 1         | 7.6323                        | 295.1500                          | <0.0001  |
| C              | 4.7078         | 1         | 4.7078                        | 182.0600                          | <0.0001  |
| AB             | 12.1835        | 1         | 12.1836                       | 471.1600                          | <0.0001  |
| AC             | 3.6787         | 1         | 3.6787                        | 142.2600                          | <0.0001  |
| BC             | 0.7014         | 1         | 0.7014                        | 27.1200                           | 0.0012   |
| A <sup>2</sup> | 10.7311        | 1         | 10.7312                       | 414.9900                          | <0.0001  |
| B <sup>2</sup> | 0.7192         | 1         | 0.7192                        | 27.8100                           | 0.0012   |
| C <sup>2</sup> | 0.3791         | 1         | 0.3791                        | 14.6600                           | 0.0065   |
| Residual       | 0.1810         | 7         | 0.0259                        |                                   |          |
| Lack of fit    | 0.0718         | 3         | 0.0239                        | 0.8775                            | 0.5238   |
| Pure error     | 0.1092         | 4         | 0.0273                        |                                   |          |
| Total          | 113.8748       | 16        | <i>R</i> <sup>2</sup> =0.9984 | Adj <i>R</i> <sup>2</sup> =0.9984 |          |

A, alkali extraction pH; B, liquid/solid ratio (mL/g); C, time (min).

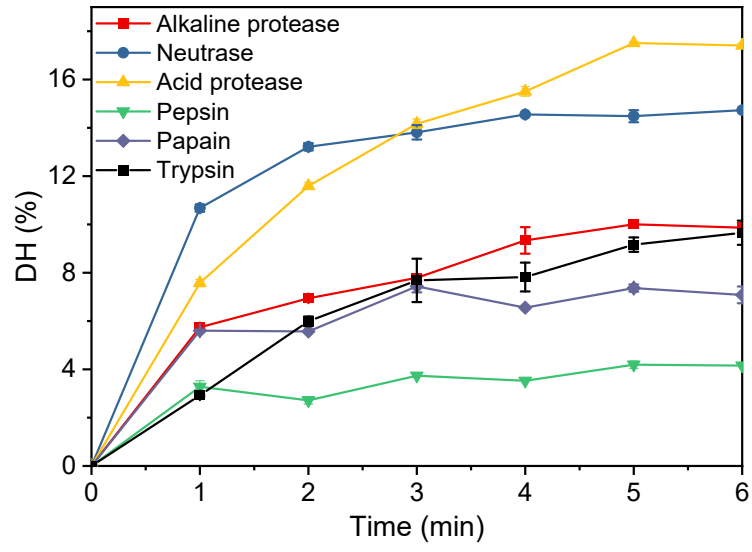

Fig. S4 The degree of hydrolysis (DH) of RAS protein powder under different proteases.

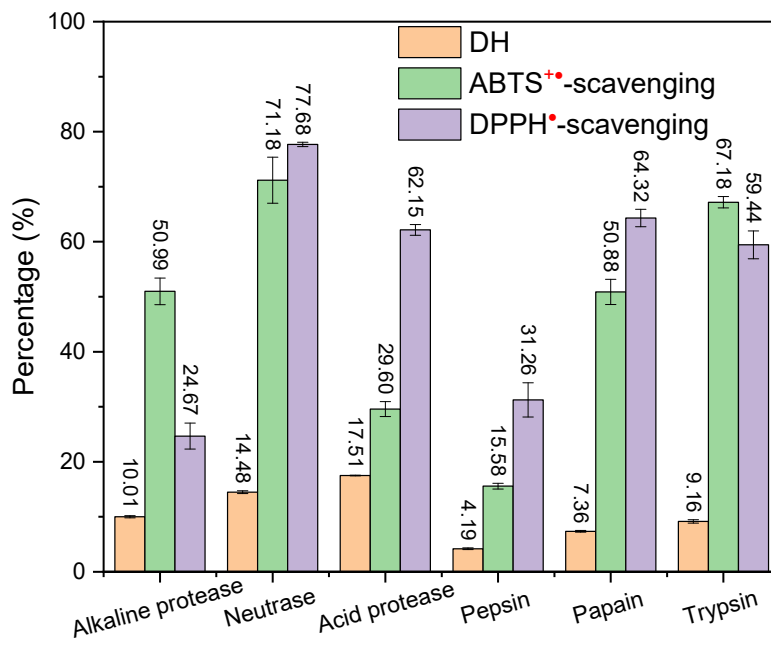

Fig. S5 The degree of hydrolysis (DH) and radical scavenging activity of RAS protein powder under different proteases.

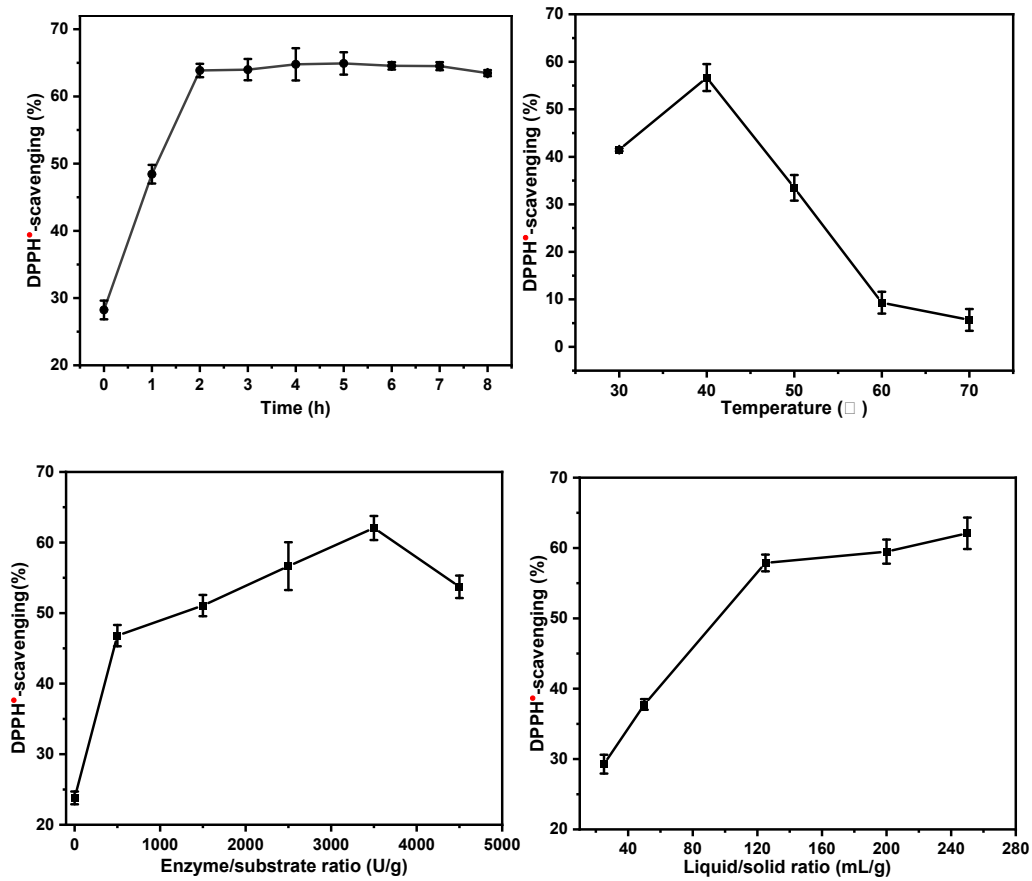

Fig. S6 Different factors on the DPPH•-scavenging activity of RPHs.

The parameters examined included hydrolysis time (0–8 h), temperature (30–70°C), enzyme/substrate ratio (500–4500 U/g), and liquid/solid ratio (25:1–250:1 mL/g).

Table S5 Four independent variables with their corresponding levels when hydrolysing RAS protein.

| Independent variables | Level |       |       |
|-----------------------|-------|-------|-------|
|                       | -1    | 0     | 1     |
| A                     | 1     | 2     | 3     |
| B                     | 30    | 40    | 50    |
| C                     | 2500  | 3500  | 4500  |
| D                     | 50:1  | 125:1 | 200:1 |

A, time (h); B, temperature (°C); C, enzyme/substrate ratio (U/g); D, liquid/solid ratio (mL/g).

Table S6 Box–Behnken response surface design scheme and results when hydrolysing RAS protein.

| Run | A | B  | C    | D   | DPPH <sup>•</sup> scavenging activity (%) |
|-----|---|----|------|-----|-------------------------------------------|
| 1   | 2 | 40 | 3500 | 125 | 45.19                                     |
| 2   | 3 | 40 | 4500 | 125 | 44.34                                     |
| 3   | 3 | 40 | 3500 | 200 | 45.02                                     |
| 4   | 2 | 50 | 3500 | 200 | 33.95                                     |
| 5   | 2 | 30 | 4500 | 125 | 36.88                                     |
| 6   | 1 | 40 | 3500 | 200 | 35.14                                     |
| 7   | 2 | 40 | 3500 | 125 | 44.34                                     |
| 8   | 2 | 30 | 3500 | 200 | 34.28                                     |
| 9   | 2 | 40 | 3500 | 125 | 45.15                                     |
| 10  | 2 | 50 | 3500 | 50  | 29.78                                     |
| 11  | 2 | 30 | 2500 | 125 | 29.11                                     |
| 12  | 1 | 40 | 2500 | 125 | 39.67                                     |
| 13  | 3 | 50 | 3500 | 125 | 38.01                                     |
| 14  | 3 | 40 | 2500 | 125 | 25.79                                     |
| 15  | 1 | 40 | 3500 | 50  | 38.91                                     |
| 16  | 2 | 40 | 3500 | 125 | 44.34                                     |
| 17  | 2 | 40 | 2500 | 200 | 31.22                                     |
| 18  | 2 | 50 | 4500 | 125 | 43.89                                     |
| 19  | 2 | 30 | 3500 | 50  | 29.33                                     |
| 20  | 3 | 40 | 3500 | 50  | 36.54                                     |
| 21  | 2 | 40 | 3500 | 125 | 45.19                                     |
| 22  | 2 | 40 | 2500 | 50  | 25.00                                     |
| 23  | 2 | 40 | 4500 | 200 | 43.27                                     |
| 24  | 1 | 40 | 4500 | 125 | 37.02                                     |
| 25  | 1 | 50 | 3500 | 125 | 47.00                                     |
| 26  | 1 | 30 | 3500 | 125 | 34.62                                     |
| 27  | 2 | 40 | 4500 | 50  | 30.77                                     |
| 28  | 3 | 30 | 3500 | 125 | 39.74                                     |
| 29  | 2 | 50 | 2500 | 125 | 33.17                                     |

A, time (h); B, temperature (°C); C, enzyme/substrate ratio (U/g); D, liquid/solid ratio (mL/g).

Table S7 ANOVA for the response surface quadratic model of the hydrolysis process.

| Source         | Sum of Squares | <i>df</i> | Mean square                   | <i>F</i>                          | <i>P</i> |
|----------------|----------------|-----------|-------------------------------|-----------------------------------|----------|
| Model          | 1163.5718      | 14        | 83.1123                       | 205.3735                          | <0.0001  |
| A              | 17.9644        | 1         | 17.9644                       | 44.3907                           | <0.0001  |
| B              | 73.1783        | 1         | 73.1783                       | 180.8264                          | <0.0001  |
| C              | 227.1213       | 1         | 227.1213                      | 561.2251                          | <0.0001  |
| D              | 183.5889       | 1         | 183.5889                      | 453.6551                          | <0.0001  |
| AB             | 49.8037        | 1         | 49.8037                       | 123.0668                          | <0.0001  |
| AC             | 112.3705       | 1         | 112.3705                      | 277.6717                          | <0.0001  |
| AD             | 100.7929       | 1         | 100.7929                      | 249.0631                          | <0.0001  |
| BC             | 2.1765         | 1         | 2.1765                        | 5.3782                            | 0.0388   |
| BD             | 15.2139        | 1         | 15.2139                       | 37.5942                           | <0.0001  |
| CD             | 9.8542         | 1         | 9.8542                        | 24.3501                           | 0.0003   |
| A <sup>2</sup> | 26.7399        | 1         | 26.7399                       | 66.0753                           | <0.0001  |
| B <sup>2</sup> | 57.9945        | 1         | 57.9945                       | 143.3065                          | <0.0001  |
| C <sup>2</sup> | 203.3195       | 1         | 203.3195                      | 502.4101                          | <0.0001  |
| D <sup>2</sup> | 259.5155       | 1         | 259.5155                      | 641.2725                          | <0.0001  |
| Residual       | 4.8563         | 12        | 0.4047                        |                                   |          |
| Lack of fit    | 4.0190         | 8         | 0.5024                        | 2.4001                            | 0.2074   |
| Pure error     | 0.8373         | 4         | 0.2093                        |                                   |          |
| Total          | 1168.4280      | 26        | <i>R</i> <sup>2</sup> =0.9958 | Adj <i>R</i> <sup>2</sup> =0.9910 |          |

A, time (h); B, temperature (°C); C, enzyme/substrate ratio (U/g); D, liquid/solid ratio (mL/g).



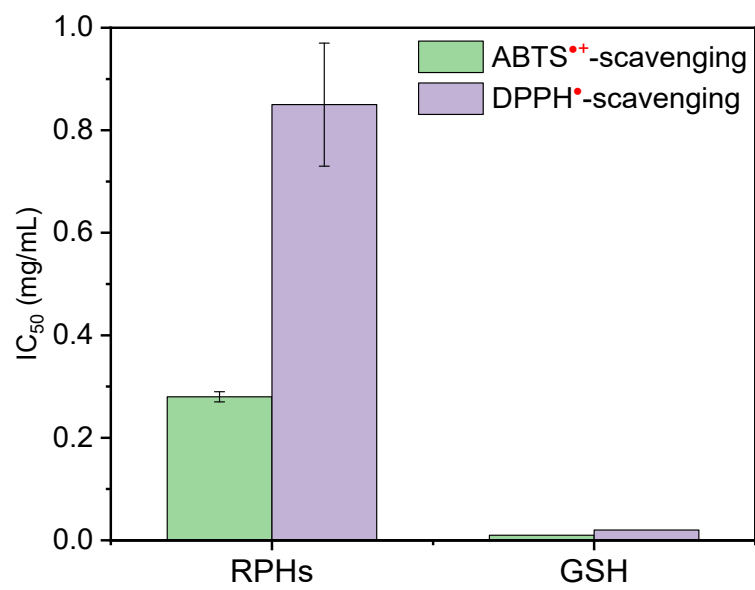

Fig. S7 The antioxidant activity of RPHs.

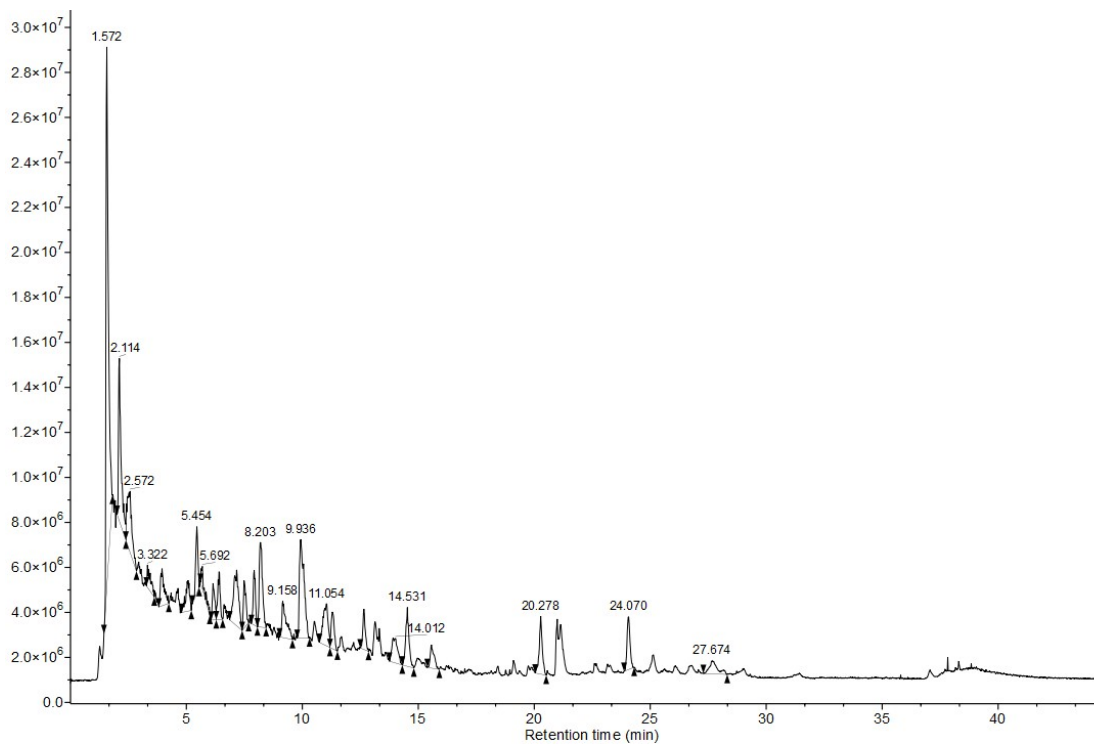

Fig. S8 The total ion chromatogram of F2.

Table S8 Information on the top 50 RASPs in peak area.

| No. | Sequence | RT (min) | <i>m/z</i> | Peak area            | Affinity (kcal/mol) |
|-----|----------|----------|------------|----------------------|---------------------|
| 1   | MFQGF    | 13.32    | 629.2735   | 4.58×10 <sup>4</sup> | -9.28               |
| 2   | FQGF     | 10.90    | 498.2343   | 9.38×10 <sup>4</sup> | -9.08               |
| 3   | VLPQL    | 12.66    | 569.3654   | 1.34×10 <sup>5</sup> | -8.07               |
| 4   | FLLP     | 14.75    | 489.3063   | 5.60×10 <sup>4</sup> | -7.95               |
| 5   | FVTP     | 7.11     | 463.2542   | 4.33×10 <sup>4</sup> | -7.9                |
| 6   | LLGY     | 10.81    | 465.2701   | 3.27×10 <sup>4</sup> | -7.88               |
| 7   | LYN      | 3.36     | 409.2076   | 1.15×10 <sup>5</sup> | -7.78               |
| 8   | LAY      | 7.19     | 366.2022   | 9.75×10 <sup>4</sup> | -7.77               |
| 9   | TVTY     | 6.17     | 483.2436   | 1.31×10 <sup>5</sup> | -7.65               |
| 10  | VTGGSYG  | 3.91     | 640.2918   | 5.23×10 <sup>4</sup> | -7.65               |
| 11  | VVNQF    | 7.93     | 606.3234   | 1.82×10 <sup>5</sup> | -7.57               |
| 12  | LATY     | 6.39     | 467.2492   | 1.08×10 <sup>5</sup> | -7.47               |
| 13  | VFL      | 12.62    | 378.2383   | 4.12×10 <sup>4</sup> | -7.47               |
| 14  | LAFLP    | 15.67    | 560.3437   | 4.70×10 <sup>4</sup> | -7.36               |
| 15  | VLNK     | 1.57     | 473.3077   | 8.00×10 <sup>4</sup> | -7.32               |
| 16  | LFSP     | 9.50     | 463.2538   | 3.52×10 <sup>4</sup> | -7.23               |
| 17  | LLAN     | 5.51     | 430.2649   | 7.10×10 <sup>4</sup> | -7.18               |
| 18  | LW       | 10.65    | 318.1808   | 3.72×10 <sup>4</sup> | -7.08               |
| 19  | VYP      | 5.79     | 378.2022   | 3.44×10 <sup>4</sup> | -7.07               |
| 20  | FF       | 11.03    | 313.1543   | 8.07×10 <sup>4</sup> | -7.06               |
| 21  | VLPGA    | 7.03     | 456.2810   | 3.51×10 <sup>4</sup> | -7.06               |
| 22  | LLPQ     | 7.25     | 470.2962   | 4.22×10 <sup>4</sup> | -7.05               |
| 23  | FY       | 7.07     | 329.1494   | 3.86×10 <sup>4</sup> | -7.02               |
| 24  | LAF      | 11.33    | 350.2072   | 3.58×10 <sup>4</sup> | -7.01               |
| 25  | VLPQ     | 5.43     | 456.2807   | 3.20×10 <sup>4</sup> | -7.03               |
| 26  | AFK      | 3.52     | 365.2184   | 3.35×10 <sup>4</sup> | -6.92               |
| 27  | VLF      | 12.90    | 378.2383   | 3.58×10 <sup>4</sup> | -6.88               |
| 28  | LVT      | 4.61     | 332.2169   | 4.54×10 <sup>4</sup> | -6.88               |
| 29  | LF       | 9.16     | 279.1700   | 1.11×10 <sup>4</sup> | -6.85               |
| 30  | LVL      | 11.01    | 344.2543   | 4.62×10 <sup>4</sup> | -6.78               |
| 31  | LLA      | 5.51     | 430.2649   | 7.10×10 <sup>4</sup> | -6.75               |
| 32  | VLA      | 4.64     | 302.2063   | 6.00×10 <sup>4</sup> | -6.72               |
| 33  | LY       | 5.71     | 295.1646   | 7.48×10 <sup>4</sup> | -6.72               |

|    |            |       |          |                      |       |
|----|------------|-------|----------|----------------------|-------|
| 34 | VF         | 7.09  | 265.1542 | 1.04×10 <sup>4</sup> | -6.70 |
| 35 | FA         | 3.99  | 237.1231 | 5.74×10 <sup>4</sup> | -6.67 |
| 36 | FL         | 9.94  | 279.1699 | 6.76×10 <sup>4</sup> | -6.63 |
| 37 | LLM        | 9.74  | 376.2254 | 6.01×10 <sup>4</sup> | -6.62 |
| 38 | LLF        | 14.43 | 392.2548 | 4.20×10 <sup>4</sup> | -6.62 |
| 39 | TF         | 2.97  | 267.1332 | 5.84×10 <sup>4</sup> | -6.60 |
| 40 | VLM        | 9.30  | 362.2074 | 5.94×10 <sup>4</sup> | -6.57 |
| 41 | LSTGTHNASQ | 1.57  | 508.2432 | 3.82×10 <sup>4</sup> | -6.53 |
| 42 | LLP        | 8.62  | 342.2383 | 6.62×10 <sup>4</sup> | -6.52 |
| 43 | LVA        | 5.15  | 302.2070 | 4.45×10 <sup>4</sup> | -6.47 |
| 44 | LVM        | 8.60  | 362.2099 | 5.14×10 <sup>4</sup> | -6.37 |
| 45 | LVP        | 6.51  | 328.2230 | 4.51×10 <sup>4</sup> | -6.20 |
| 46 | LR         | 1.57  | 288.2026 | 6.24×10 <sup>4</sup> | -6.10 |
| 47 | LL         | 8.20  | 245.1852 | 4.68×10 <sup>4</sup> | -6.08 |
| 48 | VL         | 5.63  | 231.1702 | 1.43×10 <sup>4</sup> | -5.83 |
| 49 | LM         | 5.79  | 263.1417 | 3.48×10 <sup>4</sup> | -5.78 |
| 50 | FK         | 1.57  | 294.1806 | 2.63×10 <sup>4</sup> | -5.70 |

---

Table S9 The antioxidant activity,  $E_{\text{HOMO}}$  and  $\Delta E$  of 20 common amino acids.

| No. | Amino acids | DPPH <sup>•</sup> -scavenging<br>(mM) | ABTS <sup>•+</sup> -scavenging<br>(mM) | $E_{\text{HOMO}}$ (eV) | $\Delta E$ (eV) |
|-----|-------------|---------------------------------------|----------------------------------------|------------------------|-----------------|
| 1   | Cys (C)     | 0.06 ± 0.00                           | 0.03 ± 0.00                            | -6.7572                | 6.8522          |
| 2   | Tyr (Y)     | 1.37 ± 0.30                           | 0.48 ± 0.02                            | -6.0355                | 5.6919          |
| 3   | Trp (W)     | 9.13 ± 0.64                           | 2.6 ± 0.16                             | -5.6022                | 5.0987          |
| 4   | Phe (F)     | 16.11 ± 1.54                          | n.d.                                   | -6.5377                | 6.1905          |
| 5   | Met (M)     | 29.82 ± 1.53                          | 41.9 ± 1.60                            | -6.0566                | 6.6569          |
| 6   | His (H)     | 32.23 ± 4.04                          | 5.7 ± 0.13                             | -6.1791                | 6.8026          |
| 7   | Lys (K)     | n.d.                                  | 1.65 ± 0.05                            | -6.5016                | 7.2091          |
| 8   | Arg (R)     | n.d.                                  | 2.17 ± 0.14                            | -6.0487                | 6.7087          |
| 9   | Asp (D)     | n.d.                                  | n.d.                                   | -6.9760                | 6.9646          |
| 10  | Leu (L)     | n.d.                                  | n.d.                                   | -6.8594                | 7.6614          |
| 11  | Glu (E)     | n.d.                                  | n.d.                                   | -6.8277                | 6.8090          |
| 12  | Val (V)     | n.d.                                  | n.d.                                   | -6.7638                | 7.4337          |
| 13  | Thr (T)     | n.d.                                  | n.d.                                   | -6.8840                | 7.6705          |
| 14  | Ala (A)     | n.d.                                  | n.d.                                   | -6.8383                | 7.5386          |
| 15  | Ser (S)     | n.d.                                  | n.d.                                   | -6.8811                | 7.7710          |
| 16  | Asn (N)     | n.d.                                  | n.d.                                   | -7.0065                | 7.4471          |
| 17  | Ile (I)     | n.d.                                  | n.d.                                   | -6.8133                | 7.6714          |
| 18  | Gln (Q)     | n.d.                                  | n.d.                                   | -6.8371                | 7.3236          |
| 19  | Gly (G)     | n.d.                                  | n.d.                                   | -7.1691                | 7.3630          |
| 20  | Pro (P)     | n.d.                                  | n.d.                                   | -6.8538                | 7.5590          |

$\Delta E$  ( $E_{\text{LUMO}} - E_{\text{HOMO}}$ ),  $E_{\text{LUMO}}$ , and  $E_{\text{HOMO}}$  of the optimized molecules were calculated under the level of M06-2X-D3/def2-TZVP. The radical scavenging activity was evaluated using  $\text{IC}_{50}$ , and the "n.d." means no data.

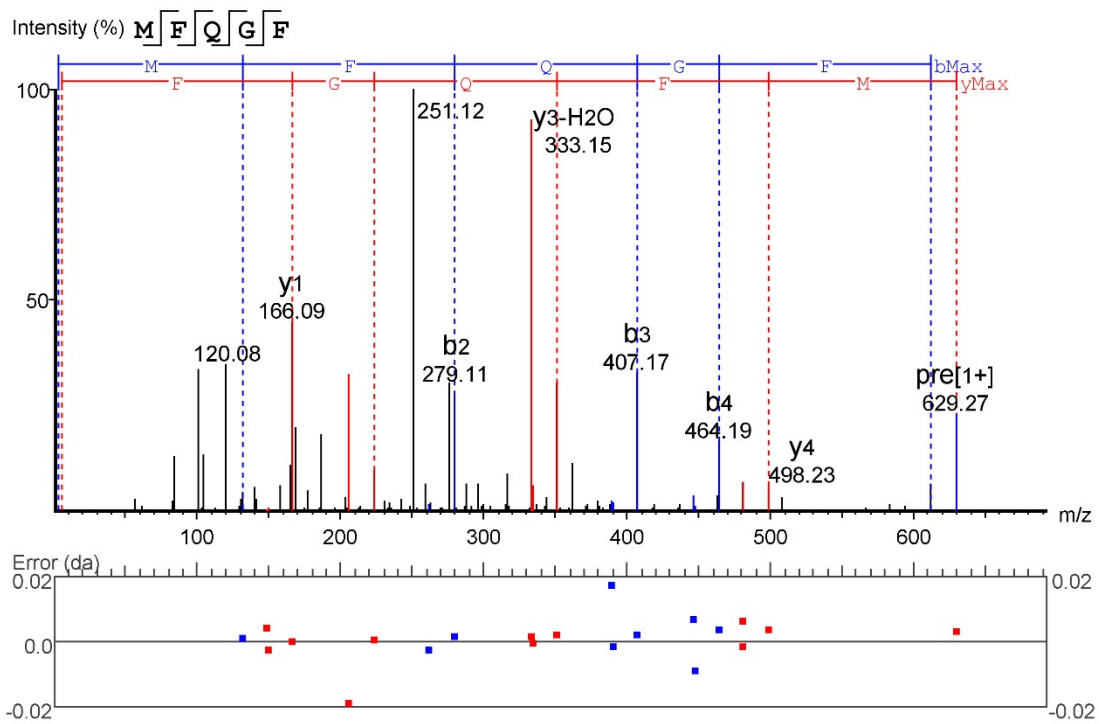

Fig. S9 The MS/MS data of RASP MFQGF.

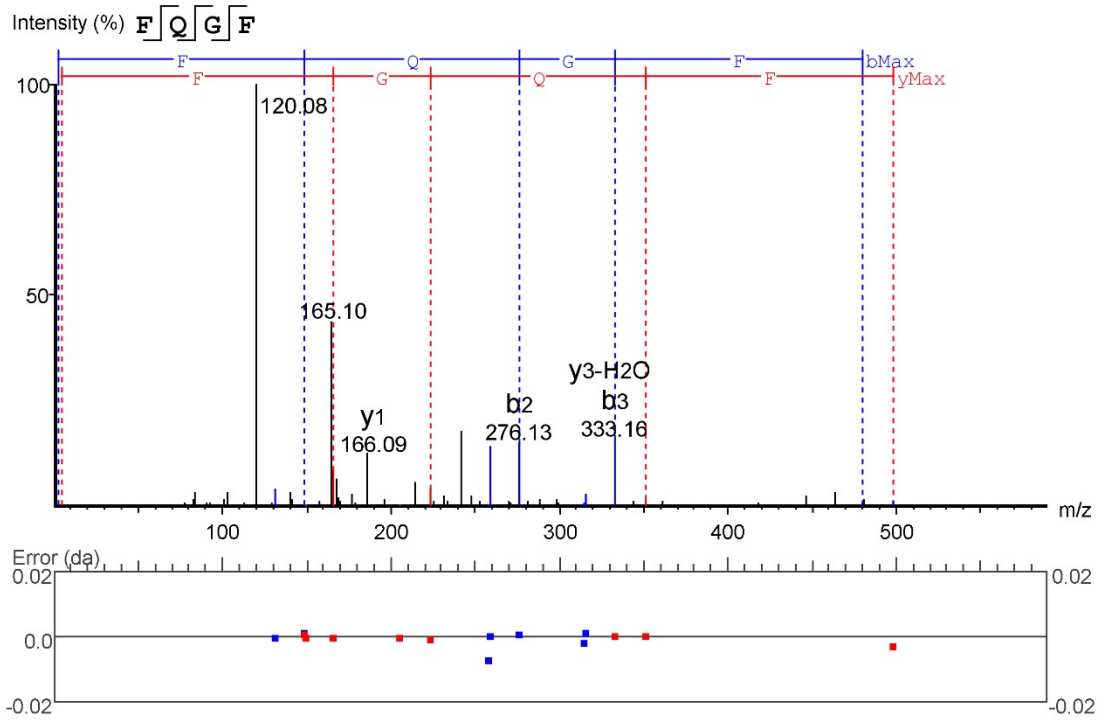

Fig. S10 The MS/MS data of RASP FQGF.

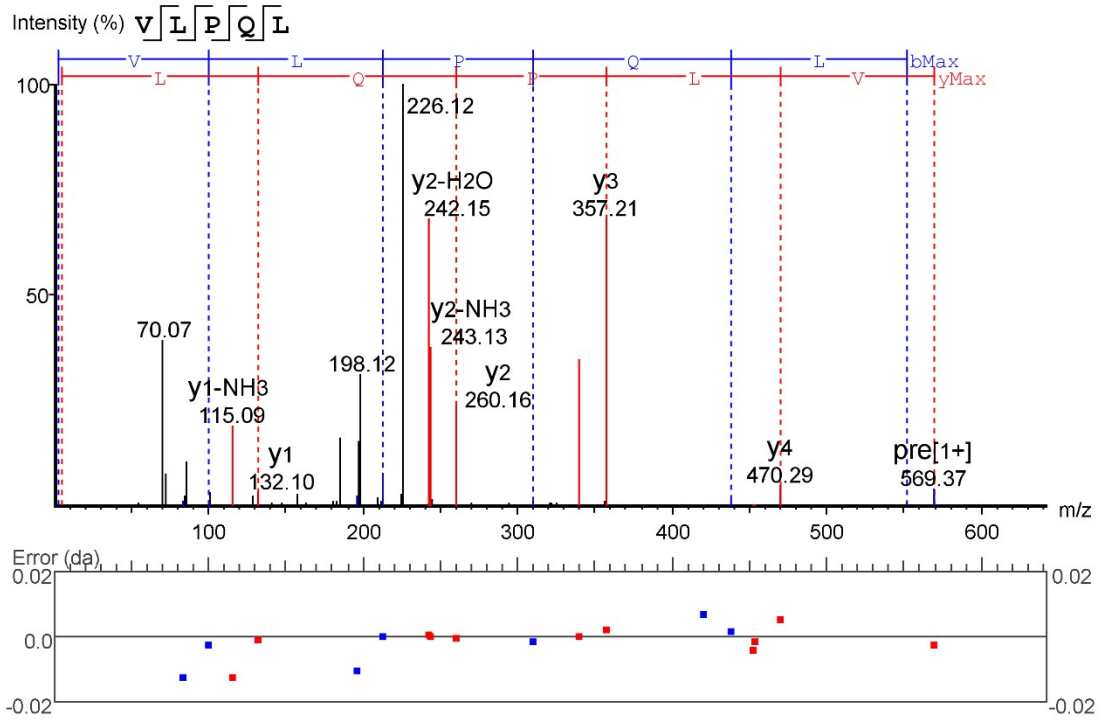

Fig. S11 The MS/MS data of RASP VLPQL.



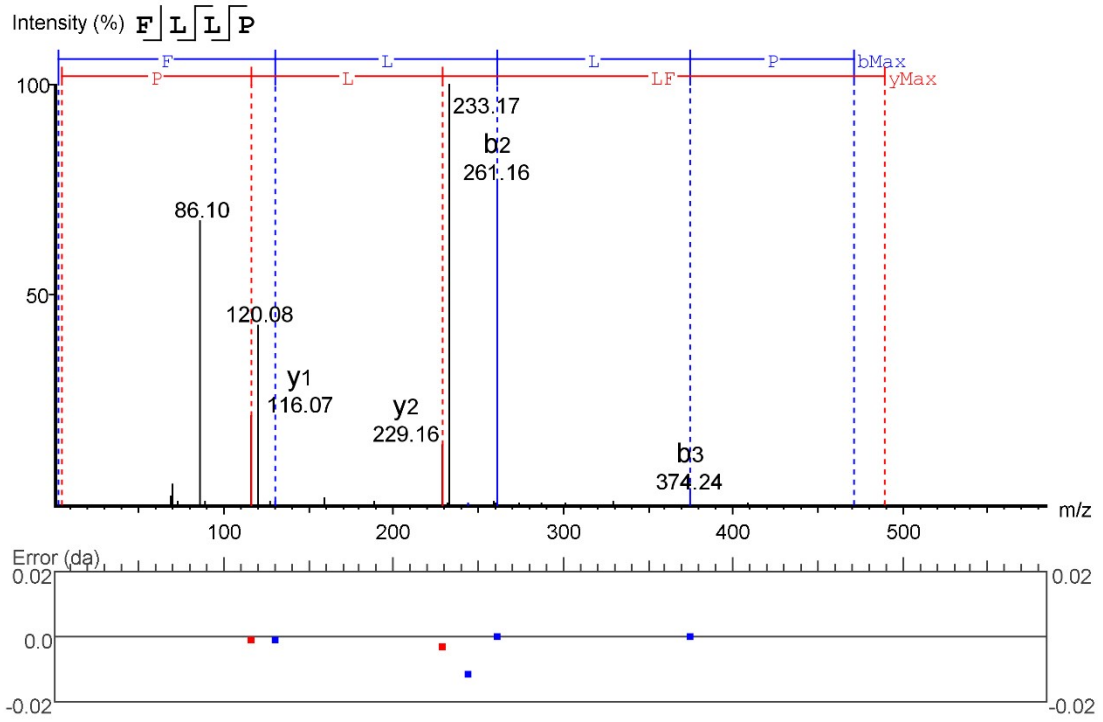

Fig. S12 The MS/MS data of RASP FLLP.

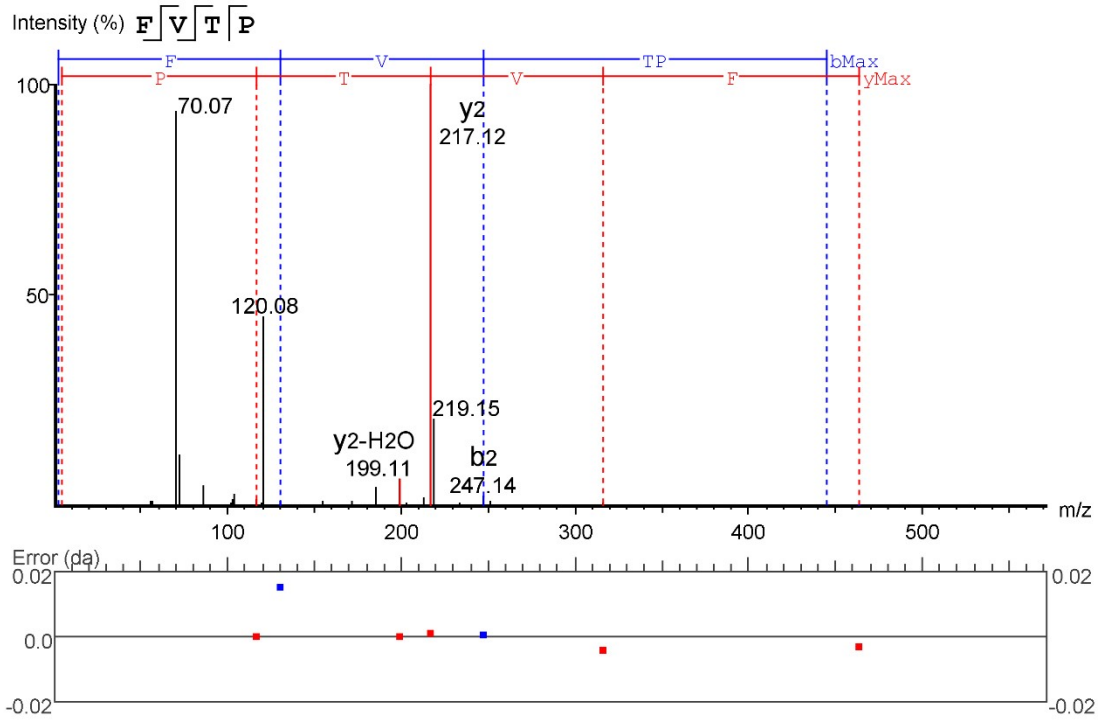

Fig. S13 The MS/MS data of RASP FVTP.

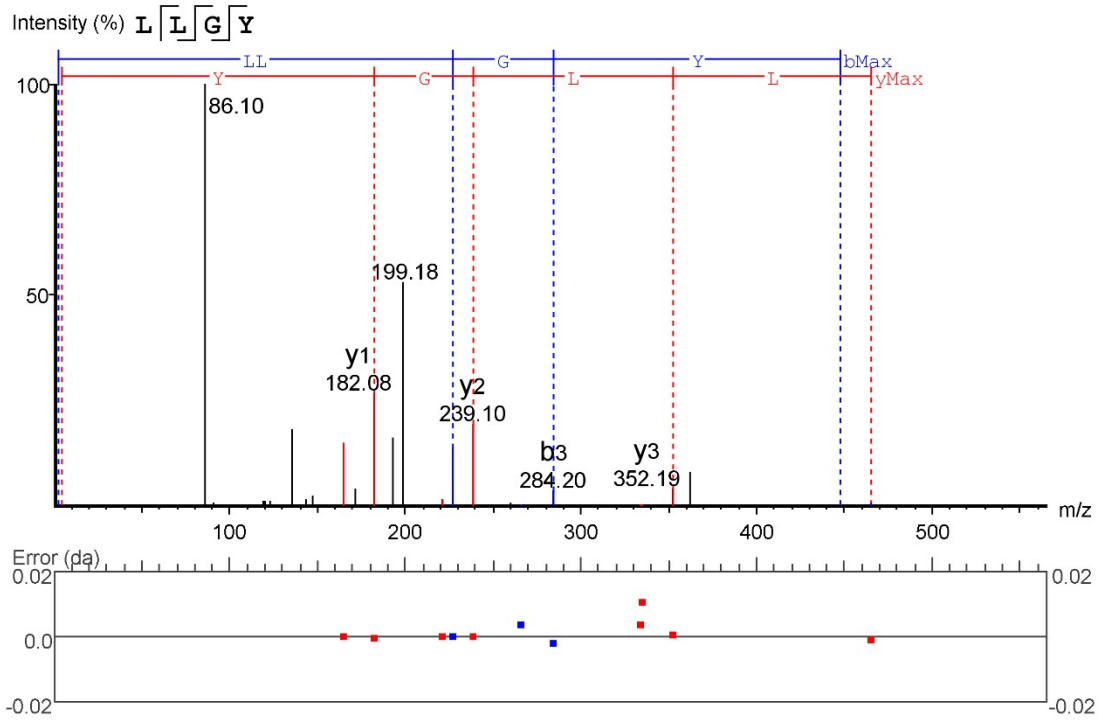

Fig. S14 The MS/MS data of RASP LLGY.

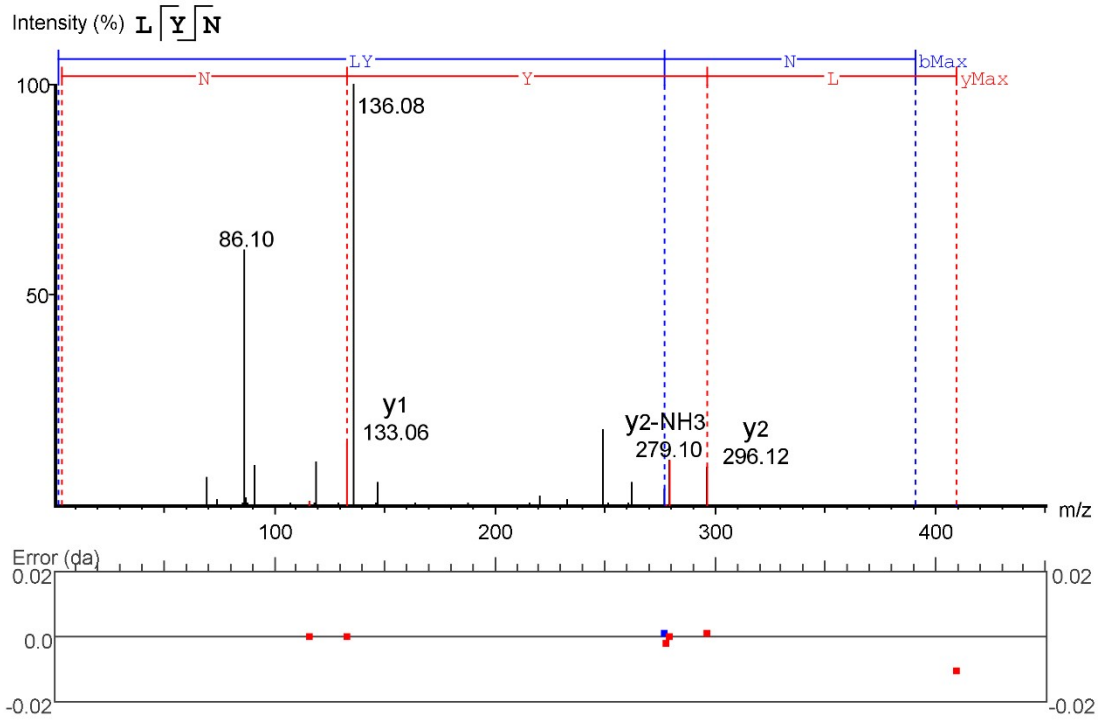

Fig. S15 The MS/MS data of RASP LYN.

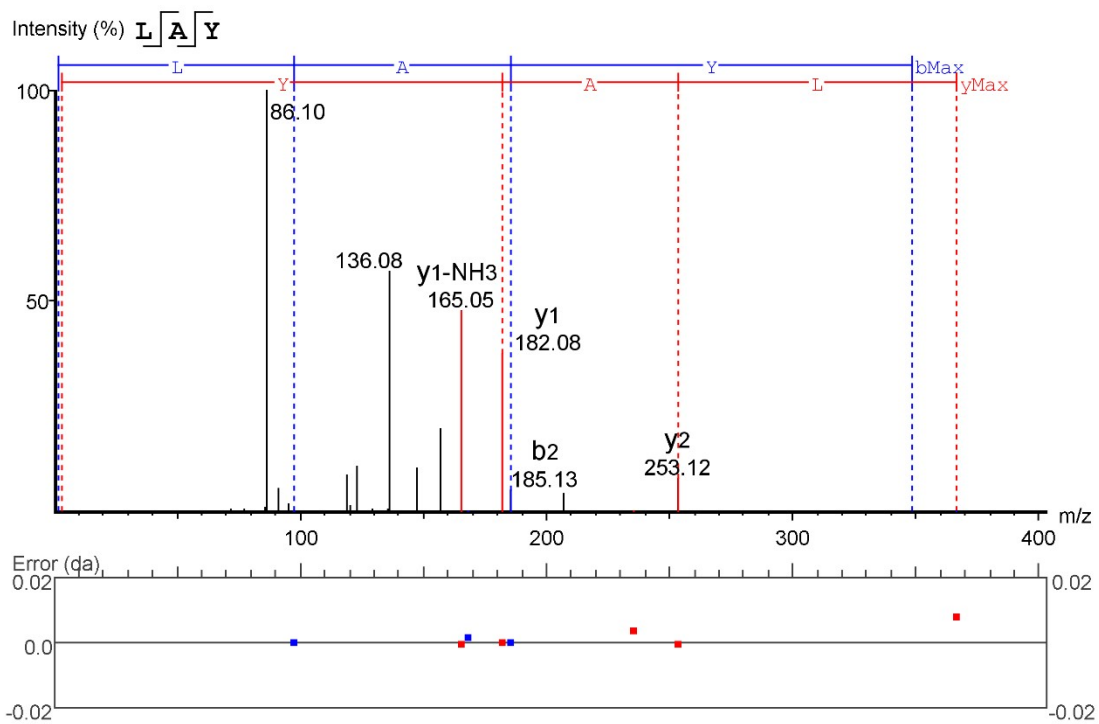

Fig. S16 The MS/MS data of RASP LAY.

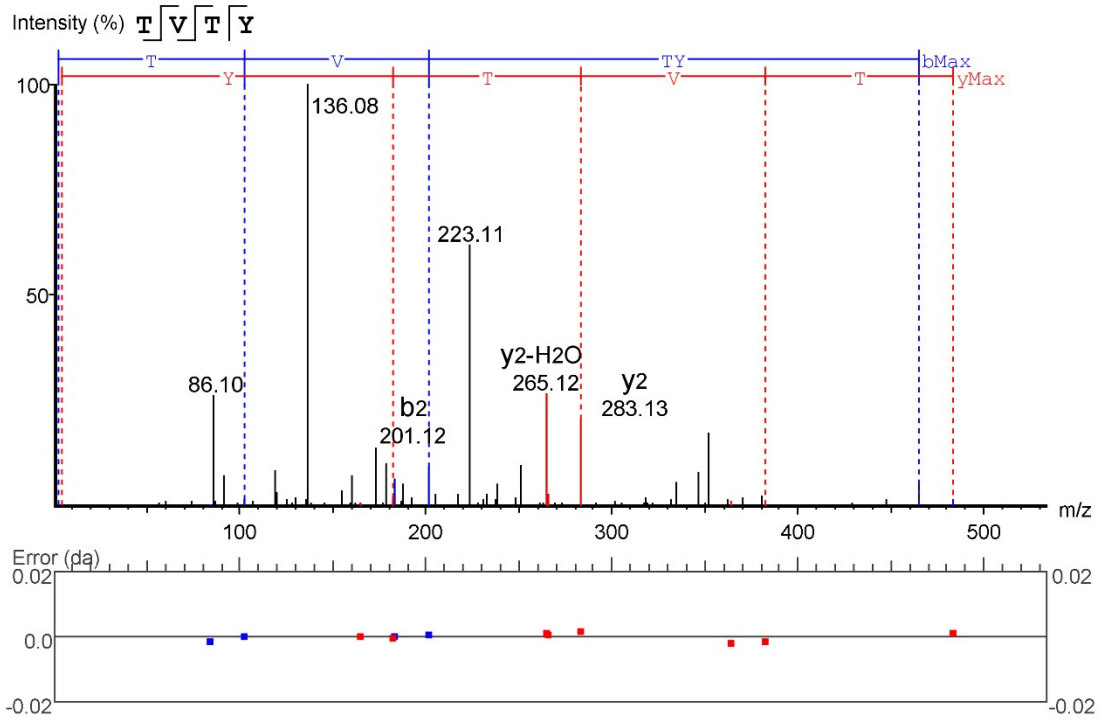

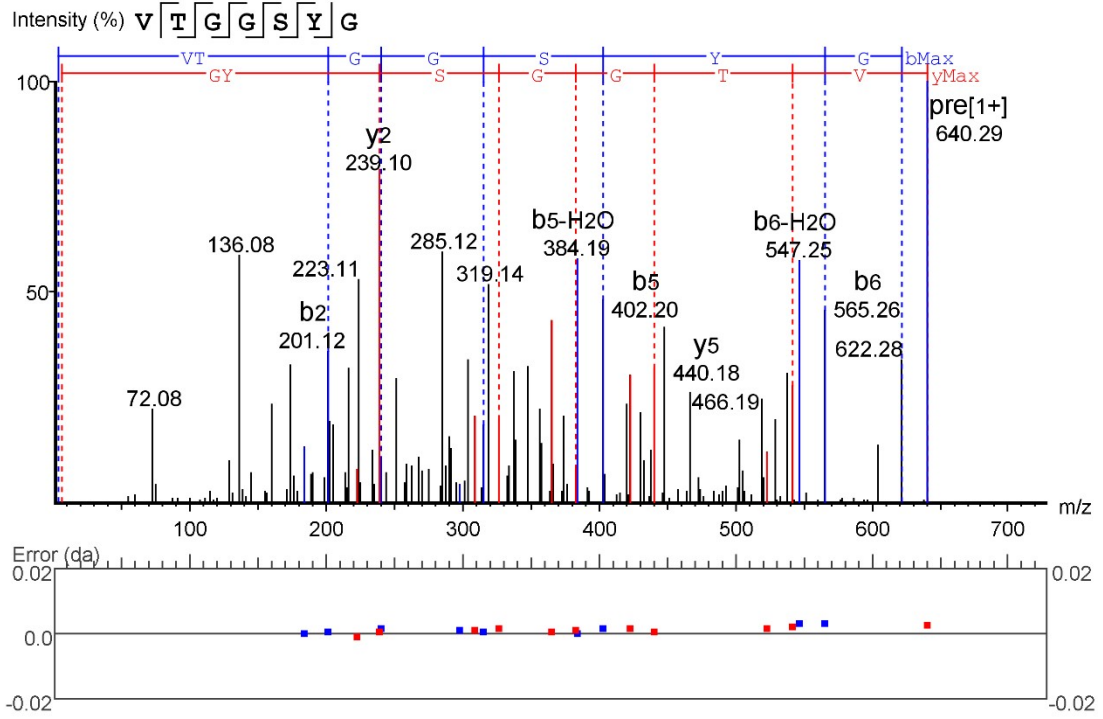

Fig. S18 The MS/MS data of RASP VTGGSYG.

Table S10 *Pearson* correlation analysis between  $IC_{50}$ ,  $E_{HOMO}$ , and  $\Delta E$  ( $r$ ,  $P$ ).

|                 | DPPH | ABTS    | $E_{HOMO}$ (eV) | $\Delta E$ (eV) |
|-----------------|------|---------|-----------------|-----------------|
| DPPH            | 1    | 0.807** | -0.780**        | 0.731**         |
| ABTS            |      | 1       | -0.692**        | 0.661**         |
| $E_{HOMO}$ (eV) |      |         | 1               | -0.981**        |
| $\Delta E$ (eV) |      |         |                 | 1               |

$\Delta E$  ( $E_{LUMO} - E_{HOMO}$ ),  $E_{LUMO}$ , and  $E_{HOMO}$  of the optimized molecules were calculated under the level of M06-2X-D3/def2-TZVP. DPPH and ABTS indicated the  $IC_{50}$  value of the corresponding radical scavenging assay, \*\* $P < 0.01$ .



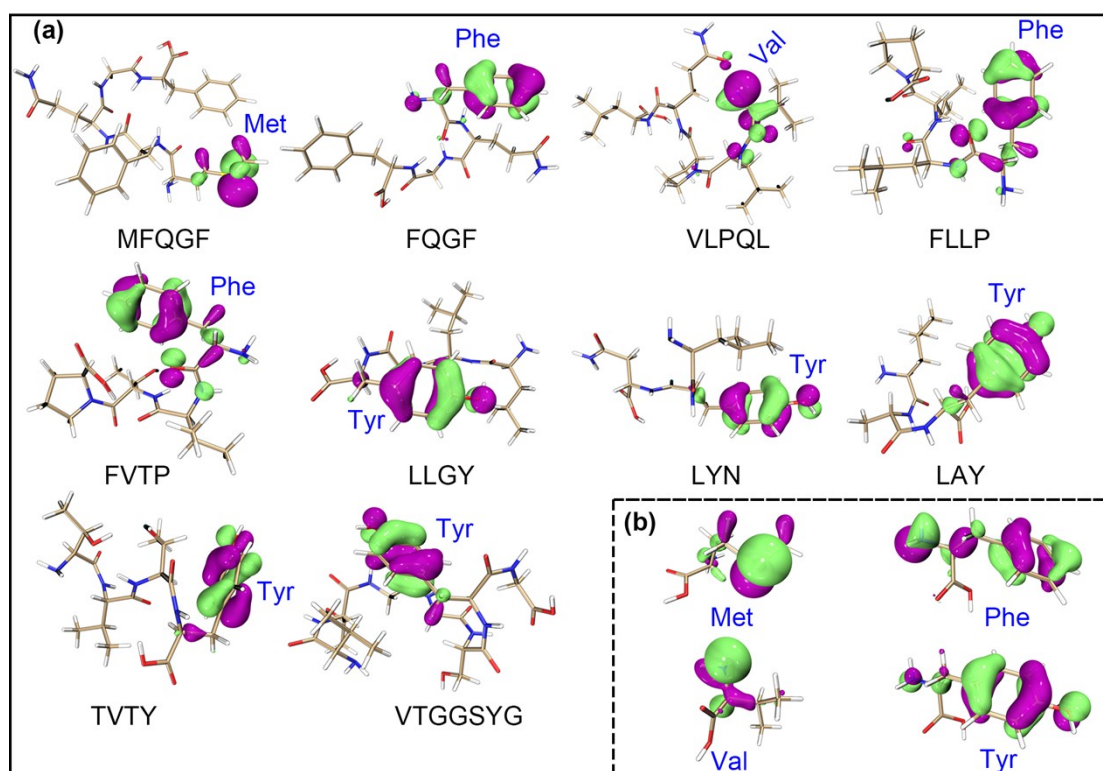

Fig. S19 HOMOs of the 10 RASPs (a) and antioxidant amino acids (b).

In the isosurface map, lime and purple colors correspond to the regions where the spin population was positive and negative, respectively (isovalue = 0.008).

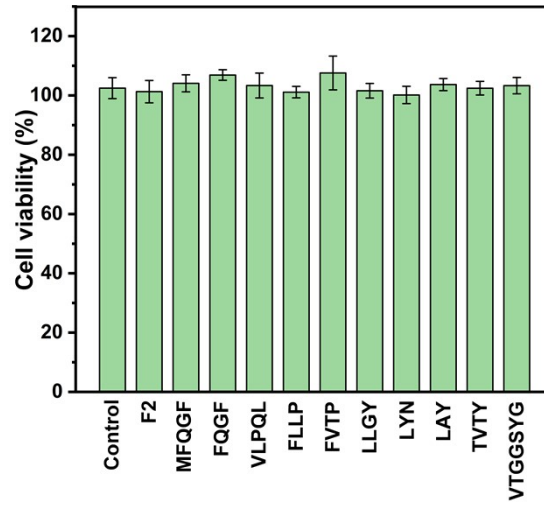

Fig. S20 HT22 cell viability under incubation with F2 fraction (500  $\mu\text{g}/\text{mL}$ ) or RASPs (1000  $\mu\text{M}$ ) for 24 h.

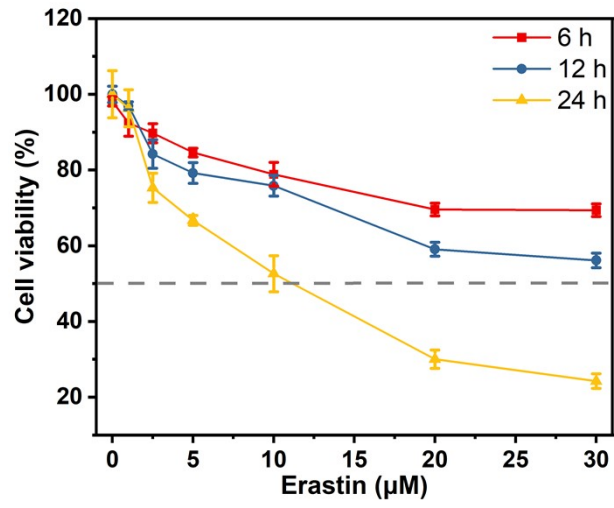

Fig. S21 HT22 cell viability under the incubation of erastin at various concentrations and times.

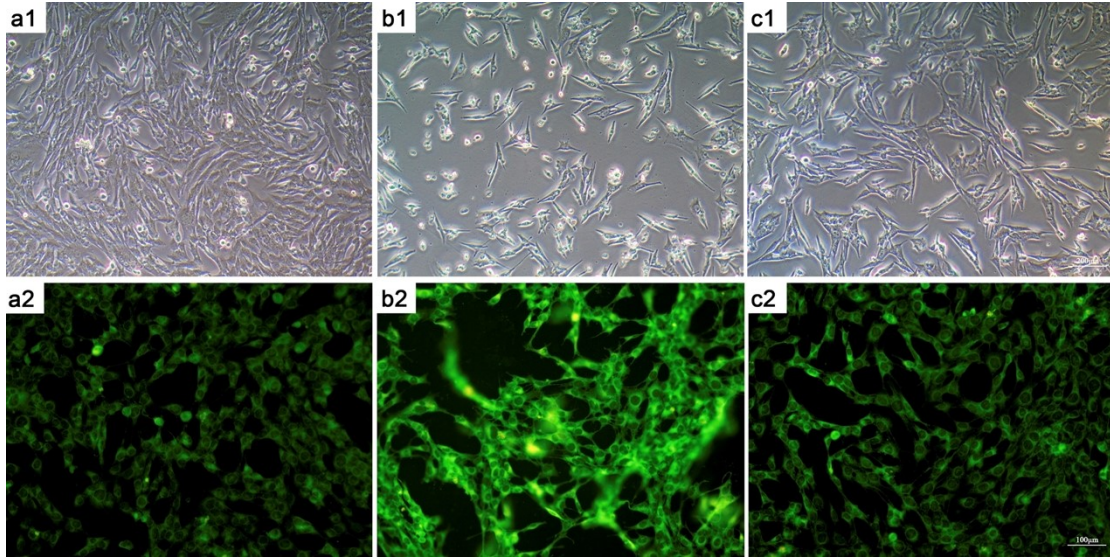

Fig. S22 Effect of erastin on HT22 cell morphology (a1~c1, 100X) and intracellular LPO content (a2~c2, 200X). (a) blank control group; (b) model group (incubated with erastin); (c) control group (incubated with erastin and Fer-1).

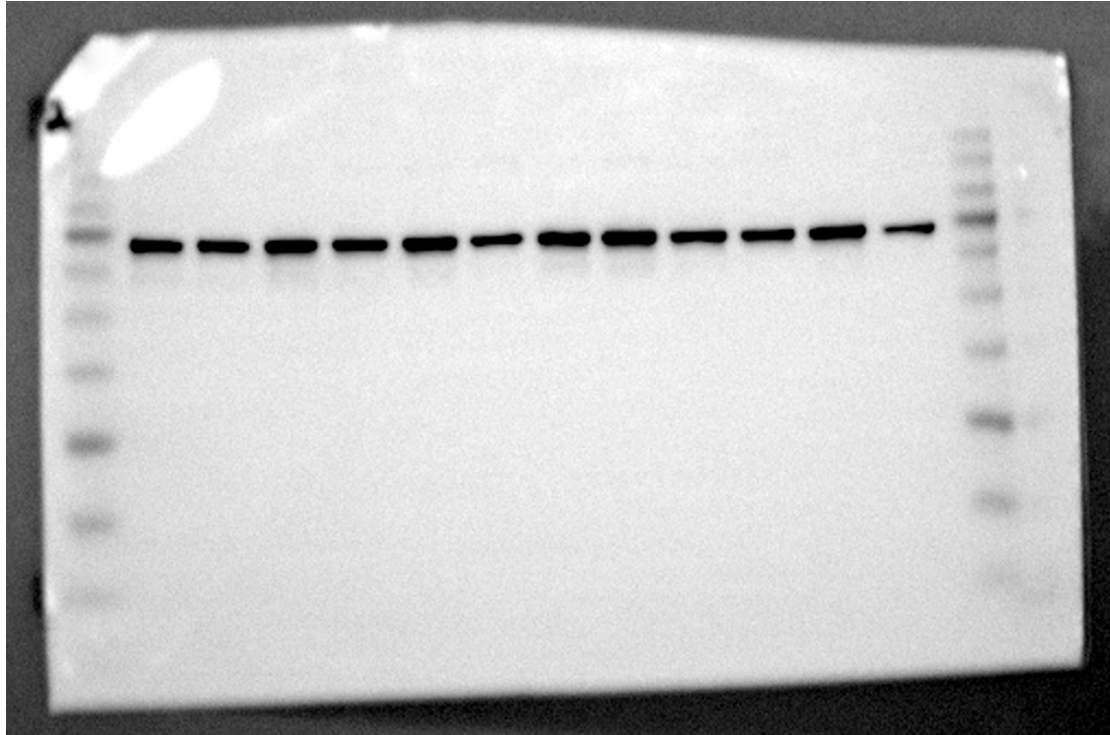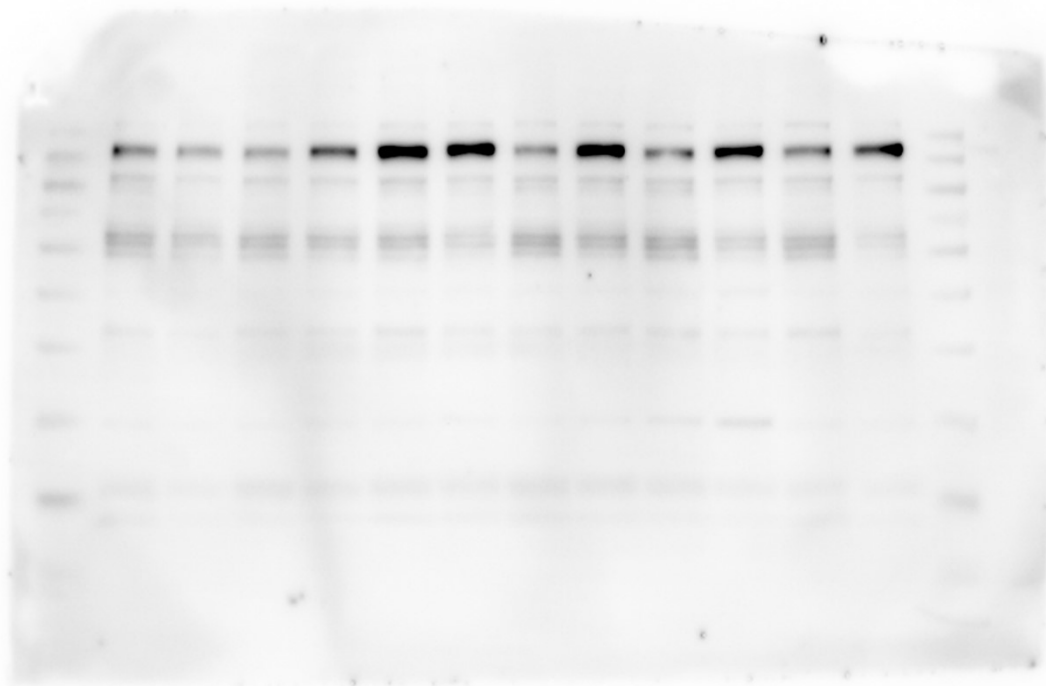

Fig. S23 Raw data of Western blots.

The top panel showed the expression of Lamin B and the bottom panel showed the expression of Nrf2. From left to right, they were groups of Control, control + ML385, model, model + ML385, MFQGF, MFQGF + ML385, LLGY, LLGY + ML385, F2, F2 + ML385, Fer-1, and Fer-1 + ML385. Since the inhibitory effect of Nrf2 by ML385 was not within the scope of this study, their data were not presented in the main text.

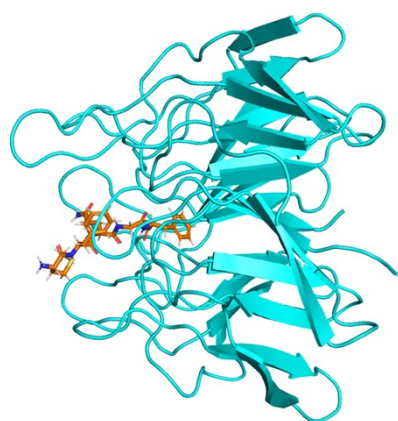

MFQGF-Keap1

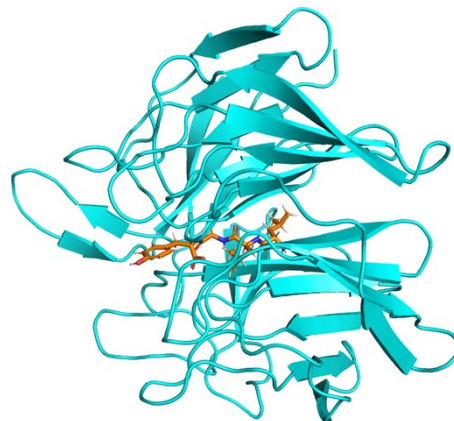

LLGY-Keap1

Fig. S24 3D conformation of MFQGF-Keap1 and LLGY-Keap1 obtained from MD simulation.

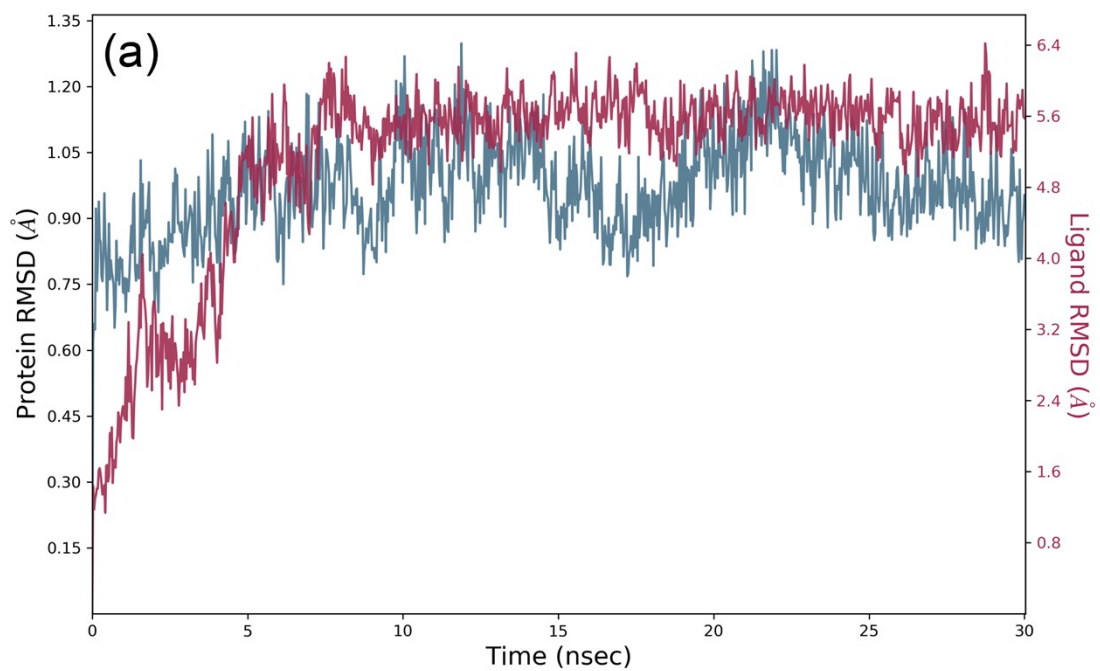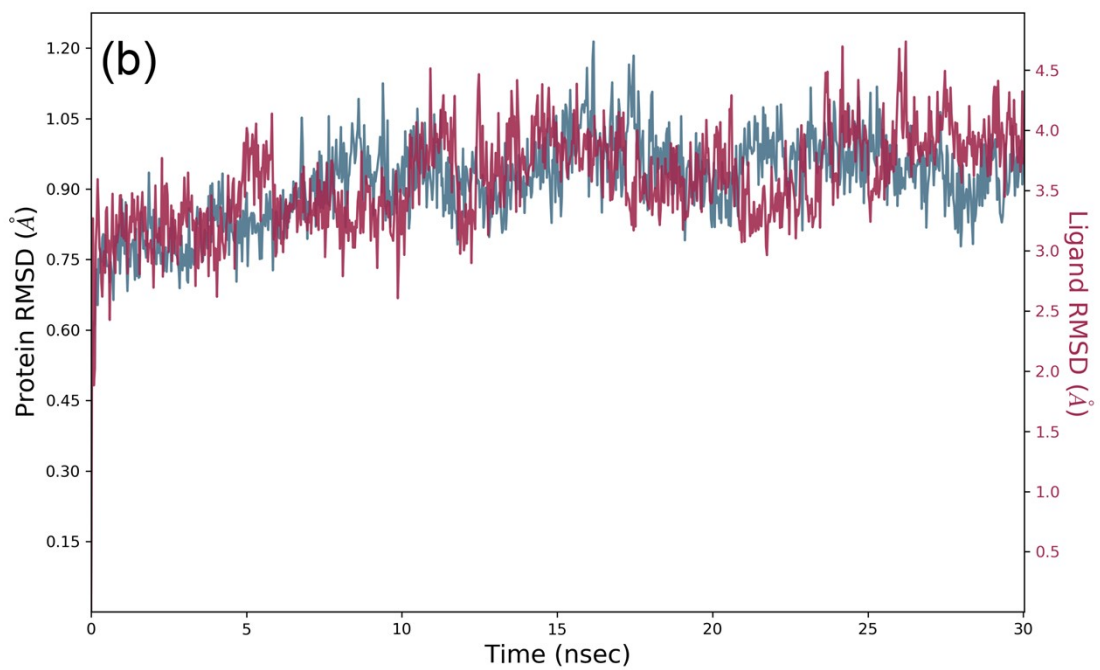

Fig. S25 RMSD of MFQGF-Keap1 (a) and LLGY-Keap1 (b) derived from MD simulation.

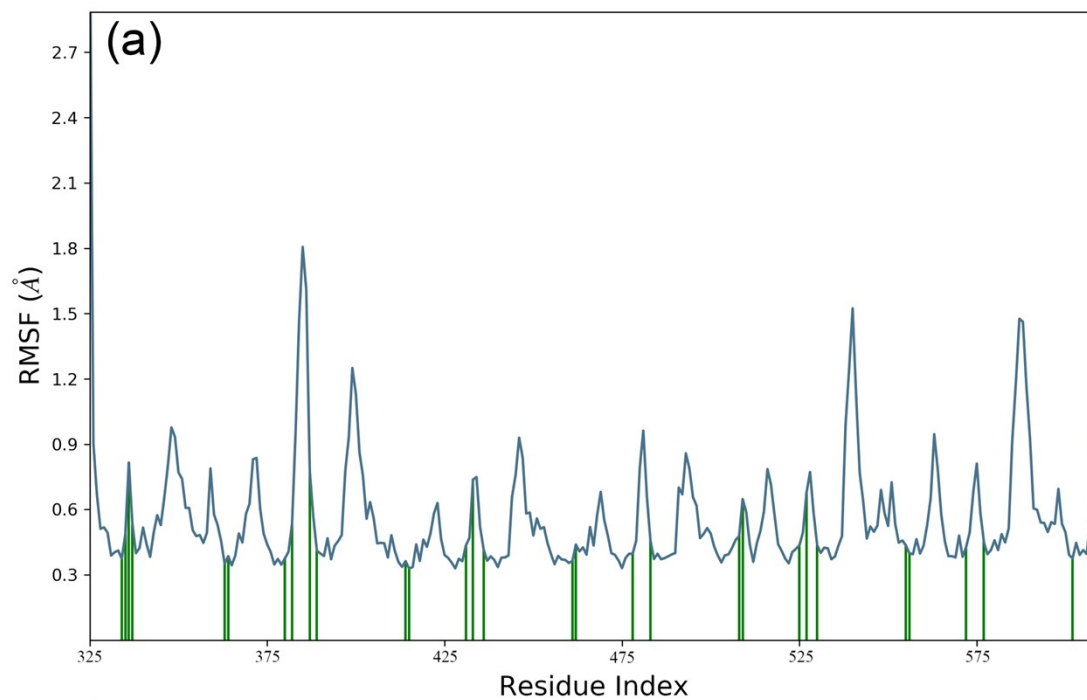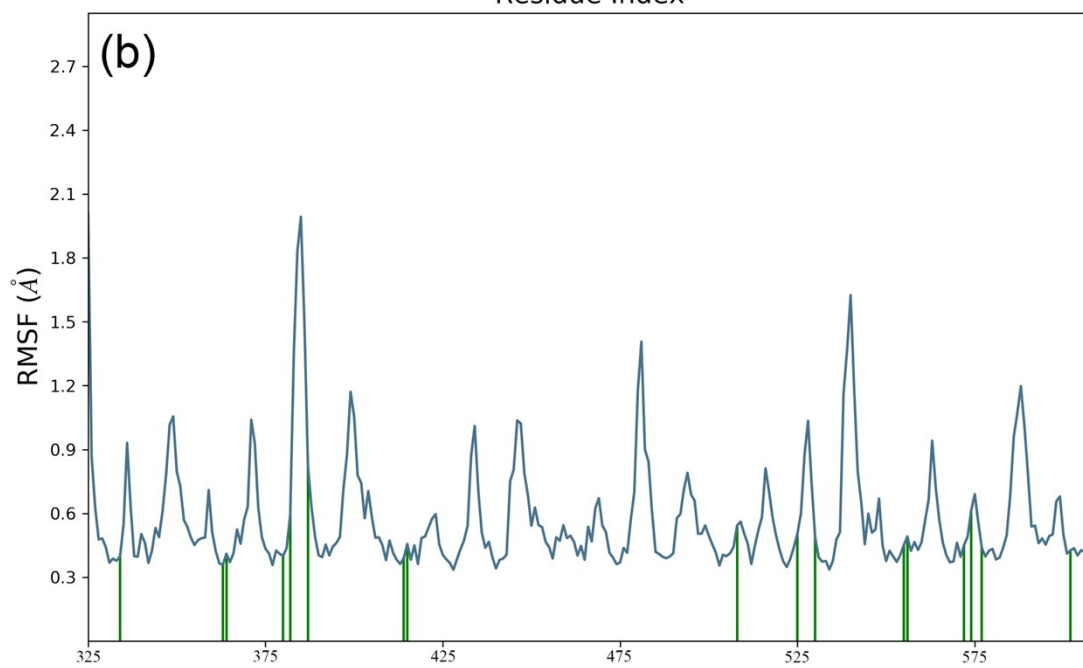

Fig. S26 RMSF of MFQGF-Keap1 (a) and LLGY-Keap1 (b) derived from MD simulation.



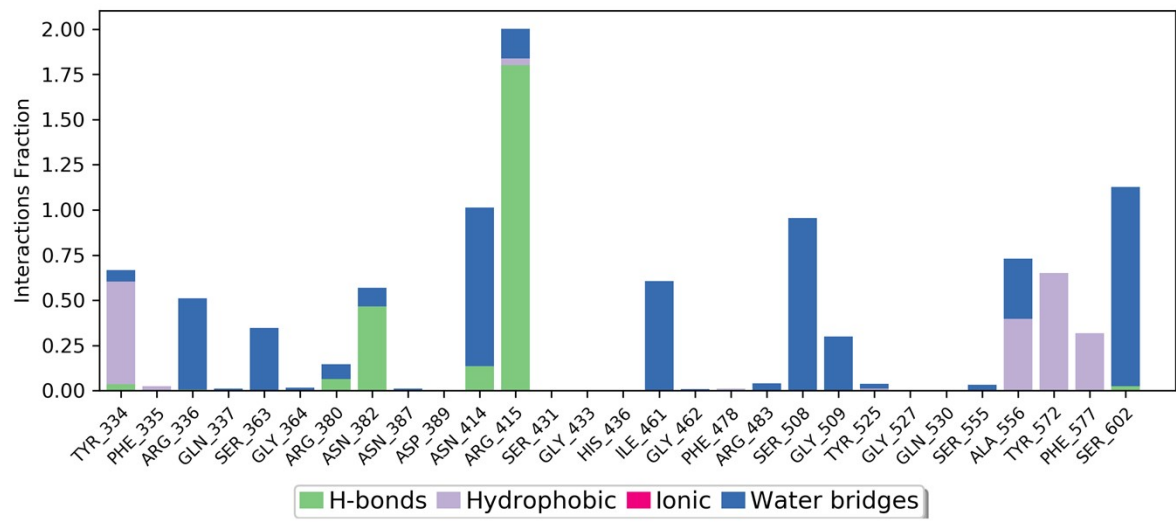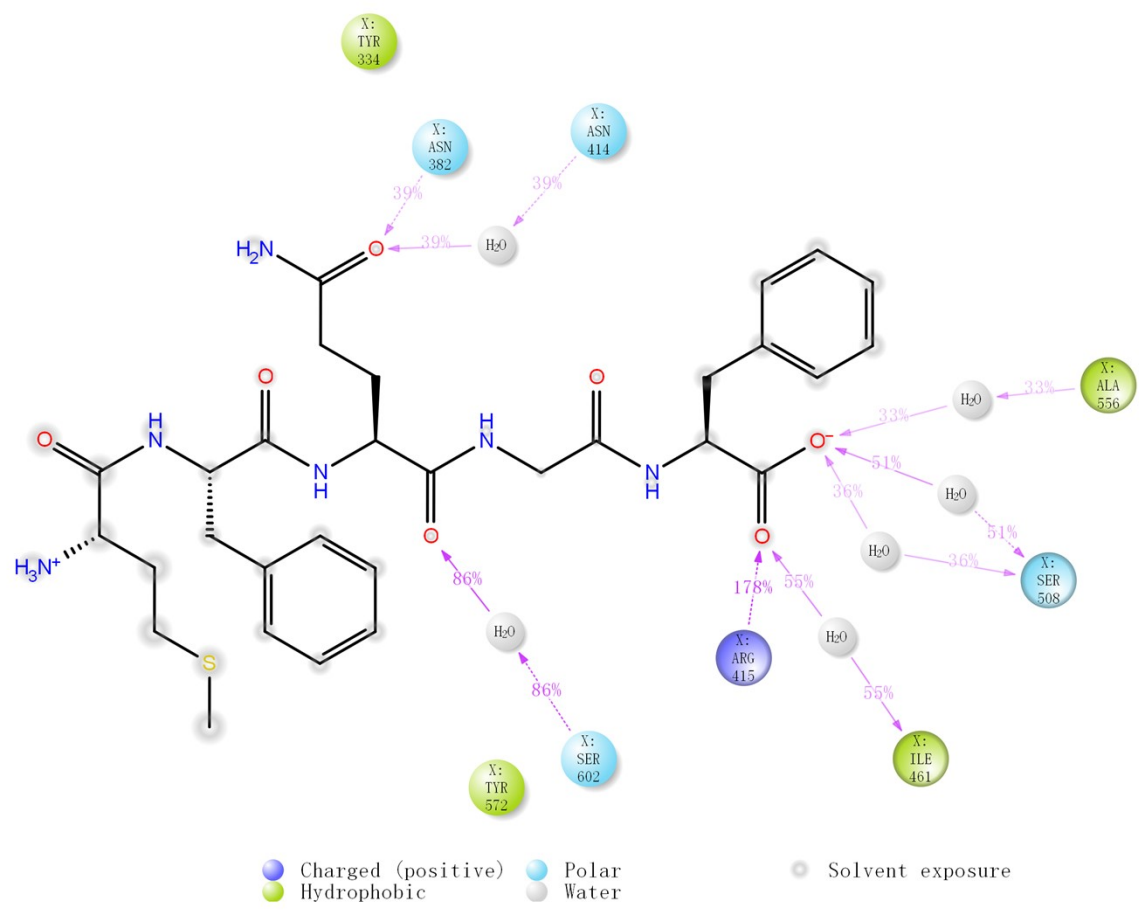

Fig. S27 Interaction mode of the MFQGF-Keap1.

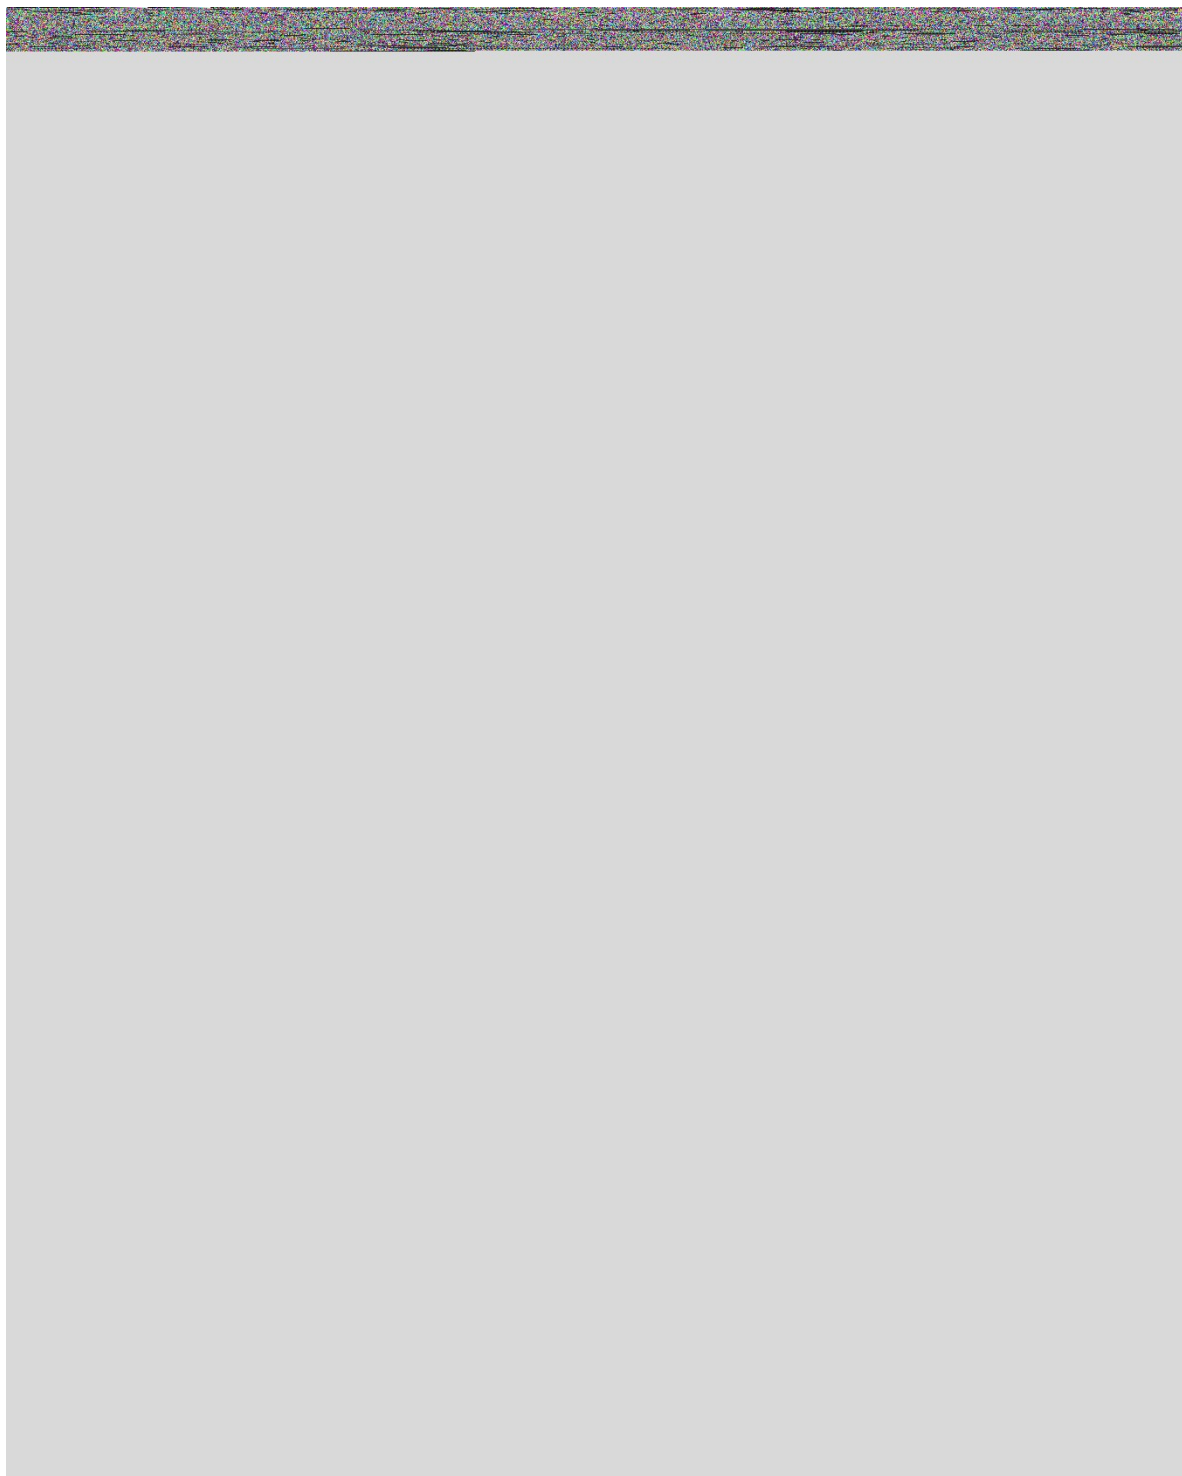

Fig. S28 Interaction mode of the LLGY-Keap1.

Table S11 Binding free energies and energy components predicted by MM/GBSA (kcal/mol).

| System            | Keap1-Nrf2          | Keap1-MFQGF        | Keap1-LLGY          |
|-------------------|---------------------|--------------------|---------------------|
| $\Delta E_{vdw}$  | $-53.56 \pm 5.31$   | $-44.69 \pm 3.82$  | $-20.09 \pm 4.76$   |
| $\Delta E_{elec}$ | $-335.71 \pm 38.03$ | $-80.75 \pm 14.05$ | $-133.06 \pm 13.30$ |
| $\Delta G_{GB}$   | $334.63 \pm 37.14$  | $105.60 \pm 11.67$ | $135.46 \pm 12.78$  |
| $\Delta G_{SA}$   | $-8.89 \pm 0.39$    | $-6.23 \pm 0.35$   | $-3.61 \pm 0.67$    |
| $\Delta G_{bind}$ | $-63.54 \pm 5.02$   | $-26.07 \pm 3.91$  | $-21.31 \pm 5.45$   |

$\Delta E_{vdw}$ : van der Waals energy.

$\Delta E_{elec}$ : electrostatic energy.

$\Delta G_{GB}$ : electrostatic contribution to solvation.

$\Delta G_{SA}$ : non-polar contribution to solvation.

$\Delta G_{bind}$ : binding free energy.
